# Supplementary material for: Solid-State Dispersions of Platinum in the SnO2 and Fe2O3 Nanomaterials
Source: MDPI journal article supplement (doi:10.3390/nano11123349), 2021-12-10
Supplement: s1 [file s1]

# Supplementary Materials

## Solid state dispersions of platinum in the SnO<sub>2</sub> and Fe<sub>2</sub>O<sub>3</sub> nanomaterials

Edi Radin <sup>1</sup>, Goran Štefanić <sup>1</sup>, Goran Dražić <sup>2,\*</sup>, Ivan Marić <sup>3</sup>, Tanja Jurkin <sup>3</sup>, Anđela Pustak <sup>3</sup>, Nikola Baran <sup>1</sup>, Matea Raić <sup>1</sup> and Marijan Gotić <sup>1,\*</sup>

<sup>1</sup> Laboratory for Molecular Physics and Synthesis of New Materials, Ruđer Bošković Institute, Bijenička c. 54, 10000 Zagreb, Croatia; Edi.Radin@irb.hr (E.R.); Goran.Stefanic@irb.hr (G.Š.); nikola.baran@irb.hr (N.B.); matea.raic@irb.hr (M.R.)

<sup>2</sup> National Institute of Chemistry, Hajdrihova 19, SI-1001 Ljubljana, Slovenia

<sup>3</sup> Radiation Chemistry and Dosimetry Laboratory, Ruđer Bošković Institute, Bijenička c. 54, 10000 Zagreb, Croatia; imaric@irb.hr (I.M.); tjurkin@irb.hr (T.J.); Andjela.Pustak@irb.hr (A.P.)

\* Correspondence: gotic@irb.hr (M.G.); goran.drazic@ki.si (G.D.)

## Table of contents

- 1) XRD individual profile fitting and Williamson-Hall analysis (Figures S1–S5)
- 2) XRD line broadening analysis (Tables S1–S10)
- 3) TEM with particle size distributions, HAADF images and EDXS elemental mapping of selected samples (Figures S6–S8)
- 4) References

1) XRD individual profile fitting and Williamson-Hall analysis (Figure S1 to S5)

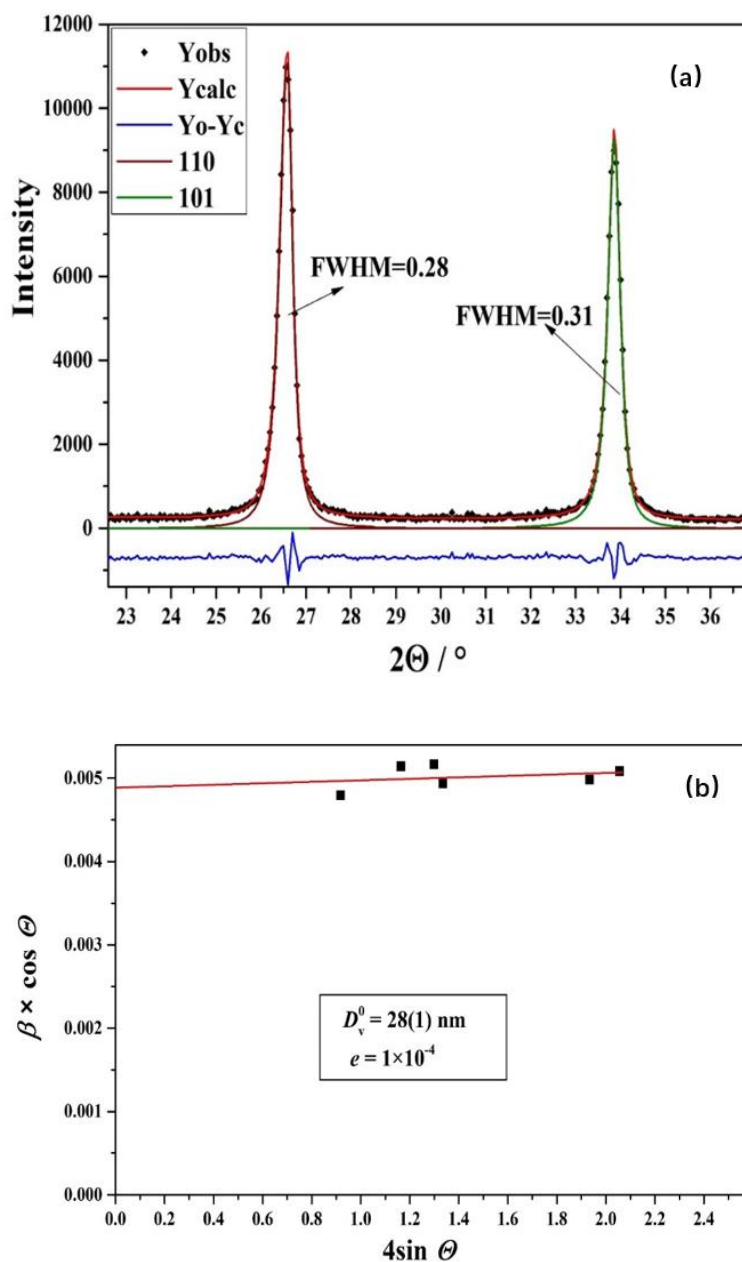

**Figure S1.** (a) The results of individual profile fitting of the cassiterite diffraction lines 110 and 101 in the **sample SN-1** (program XFIT). The differences between the observed (Y<sub>obs</sub>) and calculated (Y<sub>cal</sub>) patterns are shown in the box below. (b) Williamson-Hall analysis of hematite phase in the **sample SN-1**. The value of the volume-averaged domain size ( $D_v^0$ ) was obtained from the intercept on the y-axis, and the value of the upper limit of microstrains ( $e$ ) from the slope of the line.

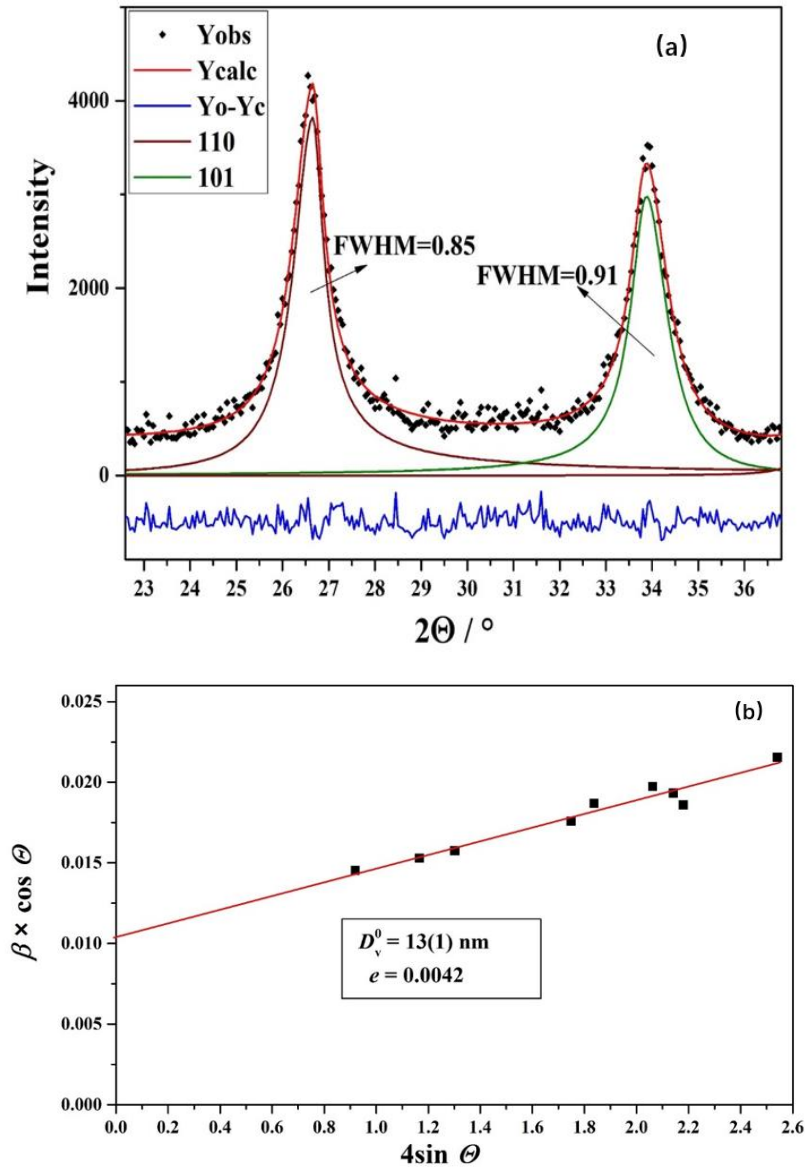

**Figure S2.** (a) The results of individual profile fitting of the cassiterite diffraction lines 110 and 101 in the **sample SN-2** (program XFIT). The differences between the observed ( $Y_{\text{obs}}$ ) and calculated ( $Y_{\text{cal}}$ ) patterns are shown in the box below. (b) Williamson-Hall analysis of hematite phase in the **sample SN-2**. The value of the volume-averaged domain size ( $D_v^0$ ) was obtained from the intercept on the y-axis, and the value of the upper limit of microstrains ( $e$ ) from the slope of the line.

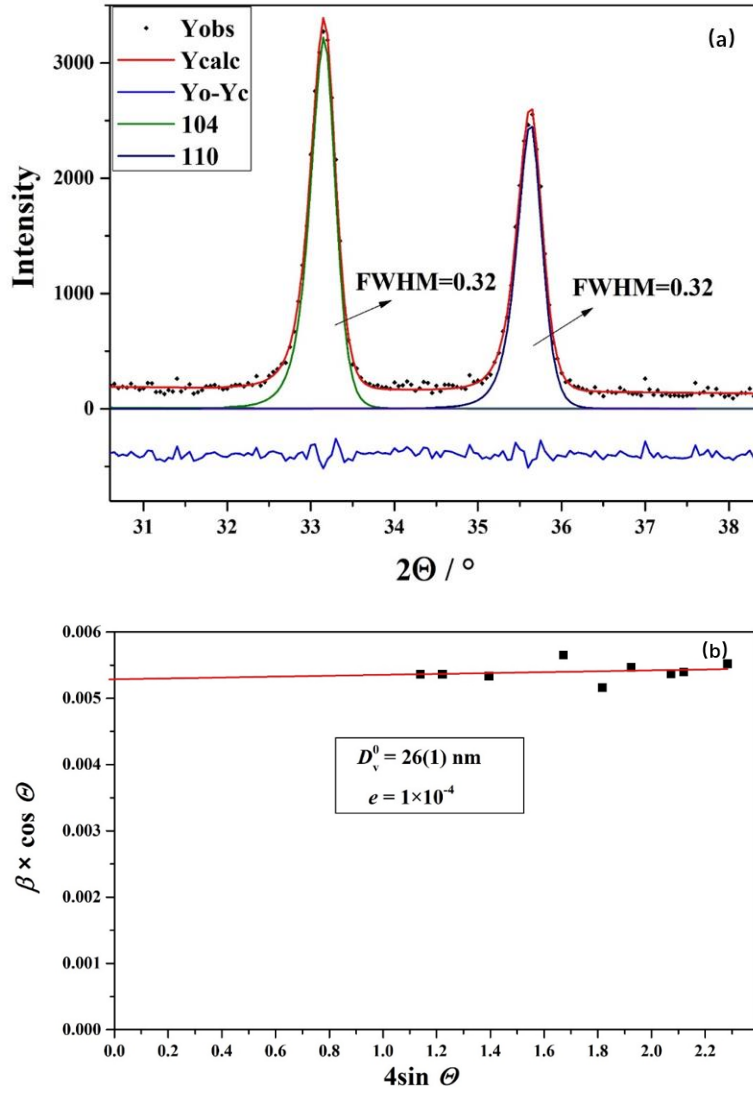

**Figure S3.** (a) The results of individual profile fitting of the hematite diffraction lines 104 and 110 in the **sample FE-0** (program XFIT). The differences between the observed (Y<sub>obs</sub>) and calculated (Y<sub>calc</sub>) patterns are shown in the box below. (b) Williamson-Hall analysis of hematite phase in the **sample FE-0**. The value of the volume-averaged domain size ( $D_v^0$ ) was obtained from the intercept on the y-axis, and the value of the upper limit of microstrains ( $e$ ) from the slope of the line.

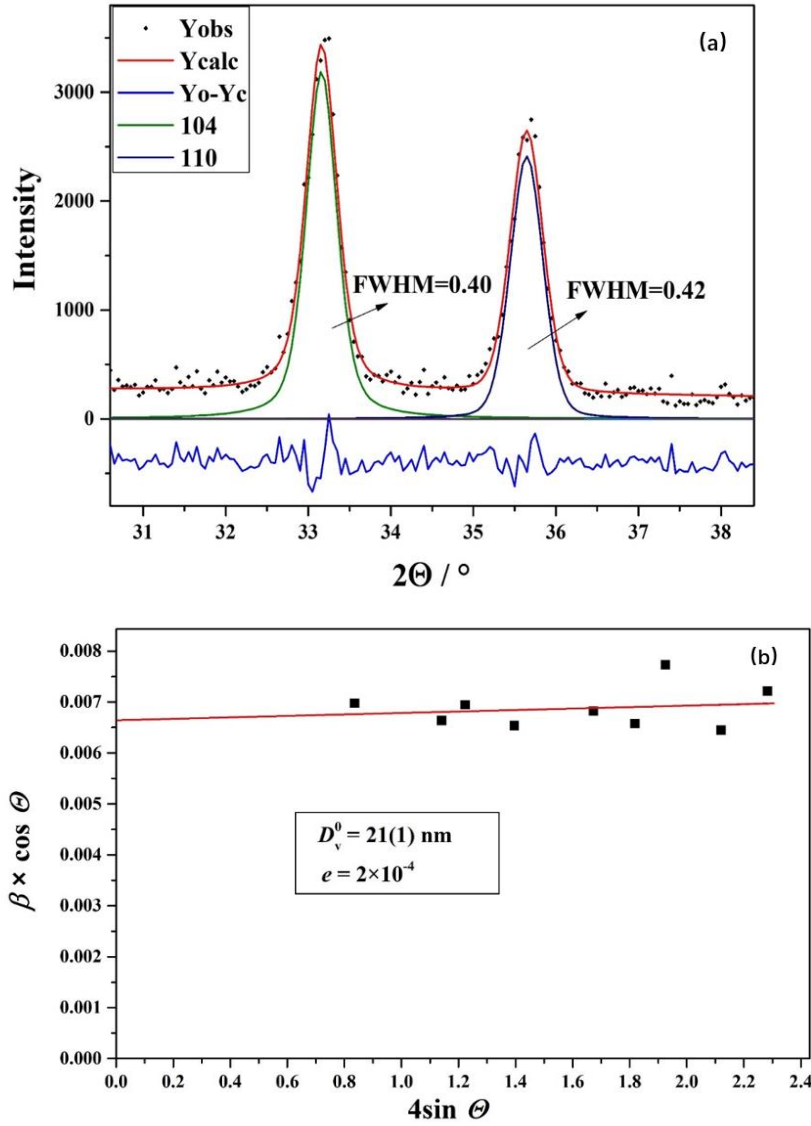

**Figure S4.** (a) The results of individual profile fitting of the hematite diffraction lines 104 and 110 in the **sample FE-2** (program XFIT). The differences between the observed ( $Y_{obs}$ ) and calculated ( $Y_{cal}$ ) patterns are shown in the box below. (b) Williamson-Hall analysis of hematite phase in the **sample FE-2**. The value of the volume-averaged domain size ( $D_v^0$ ) was obtained from the intercept on the y-axis, and the value of the upper limit of microstrains ( $e$ ) from the slope of the line.

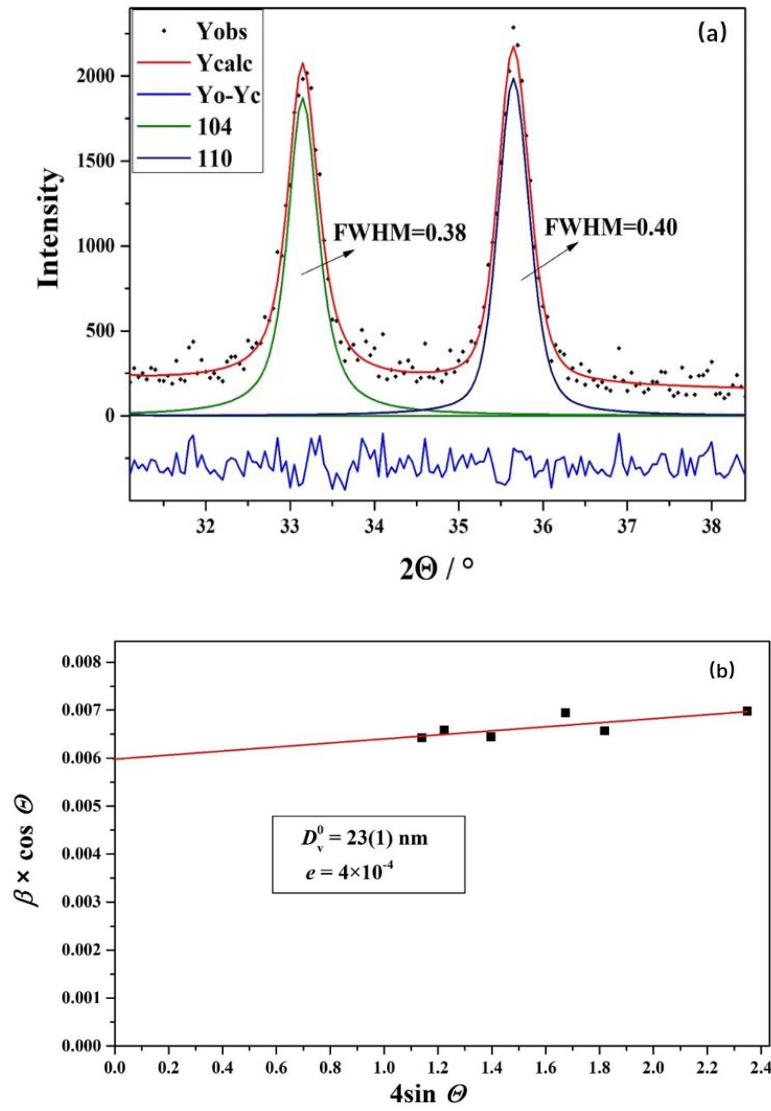

**Figure S5.** (a) The results of individual profile fitting of the hematite diffraction lines 104 and 110 in the **sample FE-3** (program XFIT). The differences between the observed (Y<sub>obs</sub>) and calculated (Y<sub>cal</sub>) patterns are shown in the box below. (b) Williamson-Hall analysis of hematite phase in the **sample FE-3**. The value of the volume-averaged domain size ( $D_v^0$ ) was obtained from the intercept on the y-axis, and the value of the upper limit of microstrains ( $e$ ) from the slope of the line.

## 2. XRD line broadening analysis

Volume average domain size in the direction normal to the reflecting planes  $hkl$  were estimated from the Scherrer equation:

$$D_{hkl} = \frac{0.9\lambda}{\beta_{hkl} \times \cos\theta}, \quad (1)$$

where  $D_{hkl}$  is a volume average domain size in the direction normal to the reflecting planes  $hkl$ ,  $\lambda$  is the x-ray wavelength ( $\text{CuK}\alpha$ ),  $\theta$  is the Bragg angle and  $\beta_{hkl}$  is the pure full width of the diffraction line ( $hkl$ ) at half the maximum intensity.  $\beta_{hkl}$  values were determined from full-width at half the maximum intensity of diffraction lines ( $B_{hkl}$ ), after correction for instrumental broadening for which the appropriate diffraction line width of a well-crystalline ZnO sample was used [1].  $B_{hkl}$  values were obtained from the results of individual profile fitting using the program XFIT [2].

Separation of the influence of crystal size on the diffraction line broadening from the influence of defects within the crystal lattice was performed using the results of Williamson-Hall analysis [3]:

$$\left( \frac{\beta_{hkl} \times \cos\theta}{\lambda} \right) = \frac{K}{D_v^0} \times \left( \frac{4e \times \sin\theta}{\lambda} \right), \quad [1]$$

where  $D_v^0$  is volume-averaged domain size and  $e$  stands for the upper-limits of microstrains.

**Table S1.** Sample names and corresponding phase composition.

| SAMPLE | PHASE COMPOSITION                           |
|--------|---------------------------------------------|
| FE-0   | Hematite ( $\alpha\text{-Fe}_2\text{O}_3$ ) |
| FE-1   | Hematite ( $\alpha\text{-Fe}_2\text{O}_3$ ) |
| FE-2   | Hematite ( $\alpha\text{-Fe}_2\text{O}_3$ ) |
| FE-3   | Hematite ( $\alpha\text{-Fe}_2\text{O}_3$ ) |
| SN-0   | Cassiterite ( $\alpha\text{-SnO}_2$ )       |
| SN-1   | Cassiterite ( $\alpha\text{-SnO}_2$ )       |
| SN-2   | Cassiterite ( $\alpha\text{-SnO}_2$ )       |

**Table S2.** Results of individual profile fitting of the hematite phase in the FE-0 sample (program XFIT), and the corresponding  $D_{hkl}$  values calculated from the Scherrer equation.

| $hkl$ | Area    | $2\Theta$ | Lortz. | FWHM  | $D_{hkl}$ |
|-------|---------|-----------|--------|-------|-----------|
| 0 1 2 | 379,42  | 24,07     | 0,1549 | 0,360 | 23        |
| 1 0 4 | 1408,29 | 33,10     | 0,3653 | 0,320 | 26        |
| 1 1 0 | 1107,35 | 35,58     | 0,3923 | 0,322 | 26        |
| 1 1 3 | 328,10  | 40,82     | 0,3541 | 0,326 | 26        |
| 0 2 4 | 591,54  | 49,43     | 0,233  | 0,356 | 25        |
| 1 1 6 | 799,51  | 54,04     | 0,5186 | 0,331 | 27        |
| 2 1 1 | 52,08   | 55,64     | 0,9036 | 0,308 | 25        |
| 1 2 2 | 234,52  | 57,53     | 0,954  | 0,357 | 26        |
| 2 1 4 | 568,92  | 62,42     | 0,4887 | 0,359 | 26        |
| 3 0 0 | 604,12  | 63,99     | 0,5312 | 0,364 | 25        |
| 2 0 8 | 41,81   | 69,60     | 0      | 0,385 | 23        |

**Table S3.** Results of individual profile fitting of the hematite phase in the FE-1 sample (program XFIT), and the corresponding  $D_{hkl}$  values calculated from the Scherrer equation.

| $hkl$ | Area    | $2\Theta$ | Lortz. | FWHM  | $D_{hkl}$ |
|-------|---------|-----------|--------|-------|-----------|
| 0 1 2 | 309,58  | 24,11     | 0,0391 | 0,352 | 23        |
| 1 0 4 | 1188,52 | 33,15     | 0,3371 | 0,299 | 27        |
| 1 1 0 | 860,68  | 35,61     | 0,2174 | 0,312 | 27        |
| 1 1 3 | 287,42  | 40,87     | 0,2681 | 0,297 | 28        |
| 0 2 4 | 517,44  | 49,47     | 0,3794 | 0,312 | 28        |
| 1 1 6 | 657,87  | 54,07     | 0,2665 | 0,325 | 27        |
| 2 1 4 | 519,92  | 62,47     | 0,4564 | 0,323 | 29        |
| 3 0 0 | 514,79  | 64,02     | 0,5438 | 0,323 | 29        |
| 2 2 0 | 81,92   | 75,46     | 0      | 0,381 | 26        |

**Table S4.** Results of individual profile fitting of the hematite phase in the FE-2 sample (program XFIT), and the corresponding  $D_{hkl}$  values calculated from the Scherrer equation.

| $hkl$ | Area    | $2\Theta$ | Lortz. | FWHM  | $D_{hkl}$ |
|-------|---------|-----------|--------|-------|-----------|
| 0 1 2 | 720,23  | 24,13     | 0,6173 | 0,408 | 20        |
| 1 0 4 | 1819,03 | 33,16     | 0,5317 | 0,396 | 21        |
| 1 1 0 | 1310,79 | 35,64     | 0,2485 | 0,417 | 20        |



|       |         |       |        |       |    |
|-------|---------|-------|--------|-------|----|
| 1 1 3 | 417,06  | 40,88 | 0,3561 | 0,399 | 21 |
| 0 2 4 | 761,62  | 49,50 | 0,7985 | 0,430 | 20 |
| 1 1 6 | 1064,48 | 54,13 | 0,8588 | 0,422 | 21 |
| 0 1 8 | 196,29  | 57,60 | 0,6064 | 0,505 | 18 |
| 3 0 0 | 705,93  | 64,06 | 0,7267 | 0,435 | 22 |
| 2 0 8 | 66,47   | 69,69 | 0,0234 | 0,503 | 19 |

**Table S5.** Results of individual profile fitting of the hematite phase in the FE-3 sample (program XFIT), and the corresponding  $D_{hkl}$  values calculated from the Scherrer equation.

| $hkl$  | Area      | $2\Theta$ | Lortz. | FWHM  | $D_{hkl}$ |
|--------|-----------|-----------|--------|-------|-----------|
| 0 1 2  | 313.7852  | 24,10     | 0,2675 | 0,423 | 19        |
| 1 0 4  | 1184.2091 | 33,12     | 0,8164 | 0,383 | 22        |
| 1 1 0  | 1129.1106 | 35,62     | 0,4814 | 0,396 | 21        |
| 1 1 3  | 329.929   | 40,88     | 0,9191 | 0,394 | 22        |
| 0 2 4  | 560.6426  | 49,48     | 1      | 0,438 | 20        |
| 1 1 6  | 755.9283  | 54,08     | 1      | 0,422 | 21        |
| 0 1 8  | 237.5661  | 57,46     | 0,7243 | 0,526 | 17        |
| 3 0 0  | 396.3072  | 64,04     | 0,4953 | 0,400 | 23        |
| 1 0 10 | 140.66    | 71,92     | 0,0006 | 0,493 | 20        |

**Table S6.** Results of individual profile fitting of the cassiterite phase in the SN-1 sample (program XFIT), and the corresponding  $D_{hkl}$  values calculated from the Scherrer equation.

| $hkl$ | Area     | $2\Theta$ | Lortz. | FWHM  | $D_{hkl}$ |
|-------|----------|-----------|--------|-------|-----------|
| 1 1 0 | 5474,616 | 26,5253   | 0,6804 | 0,282 | 29        |
| 1 0 1 | 4433,786 | 33,8221   | 0,7181 | 0,308 | 27        |
| 2 0 0 | 1212,69  | 37,906    | 0,689  | 0,313 | 27        |
| 1 1 1 | 430,7164 | 38,9908   | 0,9999 | 0,303 | 28        |
| 2 1 1 | 3651,274 | 51,7491   | 0,7637 | 0,290 | 30        |
| 2 2 0 | 793,2979 | 54,7373   | 0,602  | 0,303 | 30        |
| 0 0 2 | 430,5814 | 57,8083   | 0,7944 | 0,326 | 28        |
| 3 1 0 | 763,8534 | 61,8649   | 0,613  | 0,339 | 27        |
| 1 1 2 | 792,7732 | 64,7272   | 0,7203 | 0,298 | 31        |
| 3 0 1 | 1158,9   | 65,9645   | 0,872  | 0,327 | 29        |
| 2 0 2 | 395,519  | 71,2562   | 0,7759 | 0,320 | 31        |
| 3 2 0 | 23,3448  | 72,7145   | 0      | 0,347 | 30        |

**Table S7.** Results of individual profile fitting of the cassiterite phase in the SN-2 sample (program XFIT), and the corresponding  $D_{hkl}$  values calculated from the Scherrer equation.

| $hkl$ | Area     | $2\Theta$ | Lortz. | FWHM  | $D_{hkl}$ |
|-------|----------|-----------|--------|-------|-----------|
| 1 1 0 | 5497,116 | 26,5772   | 1      | 0,854 | 10        |
| 1 0 1 | 4140,79  | 33,8872   | 0,8898 | 0.915 | 9         |
| 2 0 0 | 1601,142 | 38,0082   | 1      | 0.955 | 9         |
| 2 1 1 | 4252,853 | 51,8407   | 1      | 1.12  | 8         |
| 2 2 0 | 920,3923 | 54,6573   | 0,7964 | 1.205 | 7         |
| 3 1 0 | 1383,989 | 62,0447   | 1      | 1.319 | 7         |
| 1 1 2 | 676,6418 | 64,7226   | 0,376  | 1.311 | 7         |
| 3 0 1 | 1410,859 | 65,9959   | 1      | 1.271 | 7         |
| 2 0 2 | 406,4227 | 71,4813   | 0,7425 | 1.255 | 7         |
| 3 2 1 | 817,0611 | 78,8599   | 0,6645 | 1.599 | 6         |

**Table S8.** Results of individual profile fitting of the cassiterite phase in the SN-0 sample (program XFIT), and the corresponding  $D_{hkl}$  values calculated from the Scherrer equation.

| $hkl$ | Area     | $2\Theta$ | Lortz. | FWHM  | $D_{hkl}$ |
|-------|----------|-----------|--------|-------|-----------|
| 1 1 0 | 6350,169 | 26,5601   | 0,8856 | 0.276 | 30        |
| 1 0 1 | 5057,013 | 33,8601   | 0,8542 | 0.284 | 29        |
| 2 0 0 | 1379,944 | 37,947    | 0,7614 | 0.281 | 30        |
| 1 1 1 | 189,4007 | 38,9854   | 0,0039 | 0.287 | 29        |
| 2 1 1 | 4564,181 | 51,785    | 0,8783 | 0.298 | 30        |
| 2 2 0 | 1038,563 | 54,7663   | 0,7523 | 0.306 | 29        |
| 0 0 2 | 531,5119 | 57,8605   | 1      | 0,267 | 34        |
| 3 1 0 | 1019,263 | 61,8989   | 0,9322 | 0,278 | 30        |
| 1 1 2 | 1107,751 | 64,7677   | 1      | 0,269 | 34        |
| 3 0 1 | 1354,293 | 65,9924   | 0,8207 | 0,323 | 29        |
| 2 0 2 | 549,4526 | 71,3059   | 1      | 0,287 | 34        |
| 3 2 1 | 1030,068 | 78,744    | 1      | 0,339 | 29        |

**Table S9.** Results of Williamson-Hall analysis of the hematite phase in samples FE-0, FE-1, FE-2 and FE-3.

| SAMPLE | $D_v^0 / \text{nm}$ | $e$ |
|--------|---------------------|-----|
|--------|---------------------|-----|

|      |    |                    |
|------|----|--------------------|
| FE-0 | 26 | $1 \times 10^{-4}$ |
| FE-1 | 28 | $1 \times 10^{-4}$ |
| FE-2 | 21 | $2 \times 10^{-4}$ |
| FE-3 | 23 | $4 \times 10^{-4}$ |

**Table S10.** Results of Williamson-Hall analysis of cassiterite phase in samples SN-0, SN-1 and SN-2.

| SAMPLE | $D_v^0 / \text{nm}$ | $e$                  |
|--------|---------------------|----------------------|
| SN-0   | 29*                 | $<1 \times 10^{-4}$  |
| SN-1   | 28                  | $1 \times 10^{-4}$   |
| SN-2   | 13                  | $4,2 \times 10^{-3}$ |

\* Williamson-Hall analysis of the cassiterite phase in the SN-0 sample indicated the presence of size anisotropy wherein the diffraction lines with the Miller indices  $hk2$  are somewhat narrower ( $D_v$  value in the direction of  $hk2$  was estimated at 34 nm).

### 3. STEM images with particle size distributions and HAADF images of selected samples

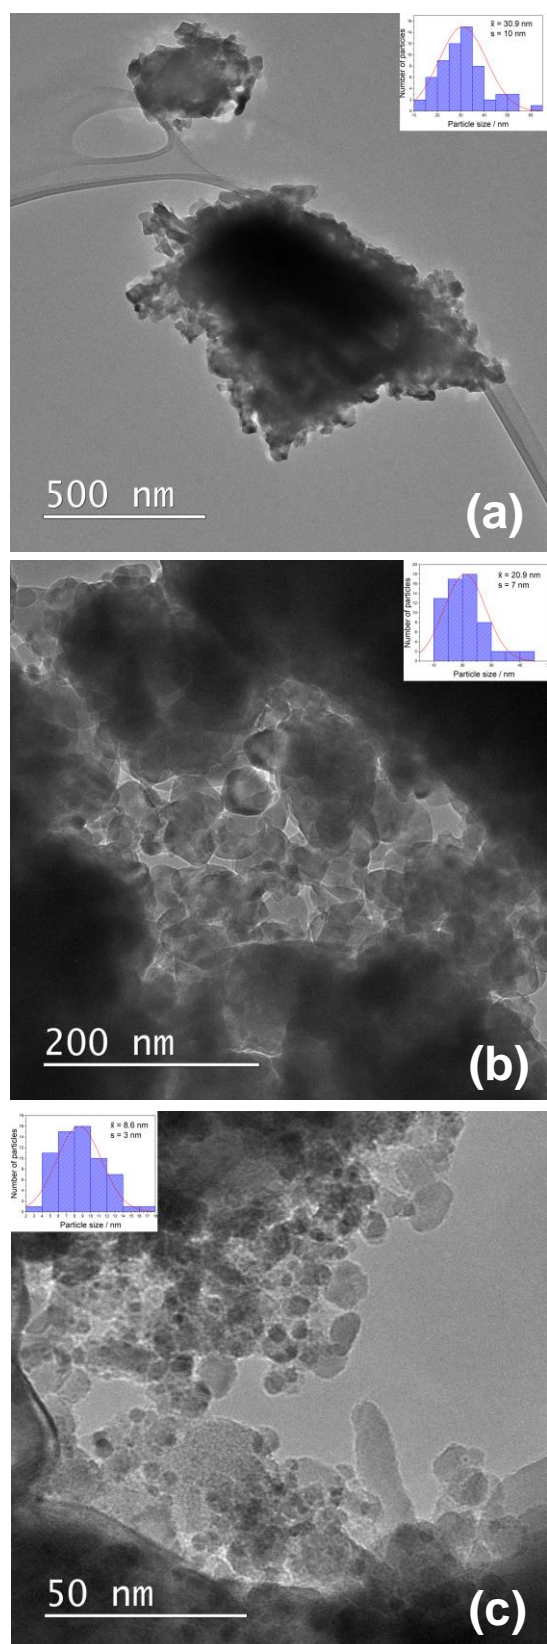

**Figure S6.** STEM images with particle size distributions (inset) of samples FE-1 (a), FE-2 (b) and FE-3 (c). The mean particle sizes of 30.9, 20.9 and 8.6 nm were measured for samples FE-1, FE-2 and FE-3, respectively.

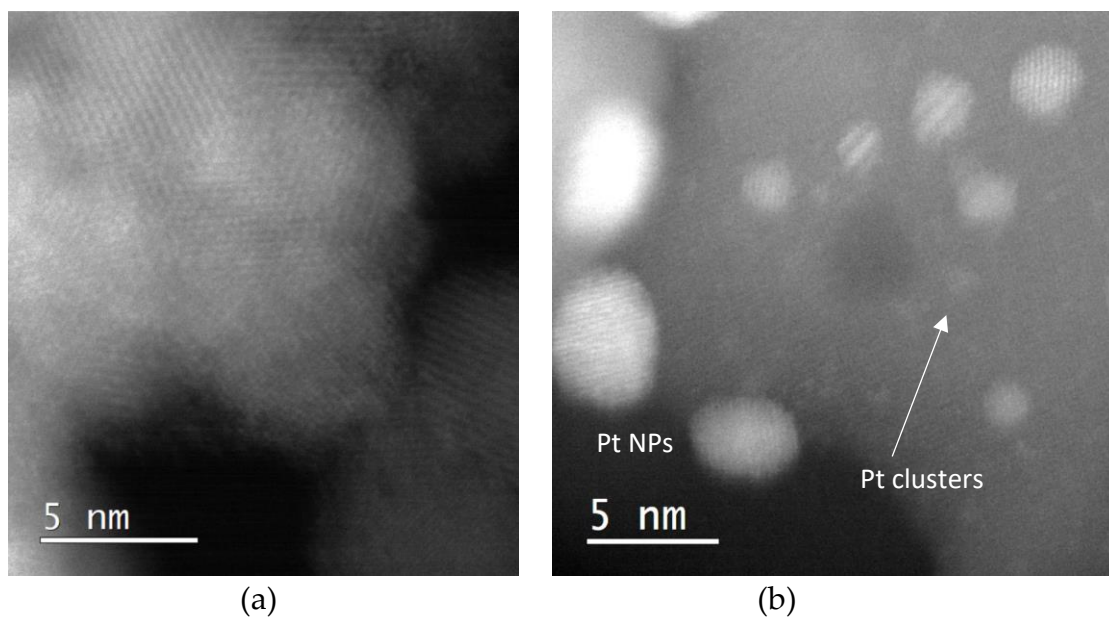

**Figure S7.** HAADF images of samples SN-1 (a) and sample FE-1 (b). HAADF image of sample SN-1 shows uniform contrast, whereas in sample FE-1 Pt nanoparticles and cluster are clearly visible. Sn and Pt have very different atomic numbers (50 vs. 78) and the intensity of the HAADF image (besides the thickness) is approximately related to  $Z^{1.7}$ . In the case of Pt-based particles or Pt-rich surface layers, this should be seen as areas of higher contrast. At the same time, the EDXS analysis shows 2-3 wt% Pt in these areas (so these areas are not pure SnO<sub>2</sub>).

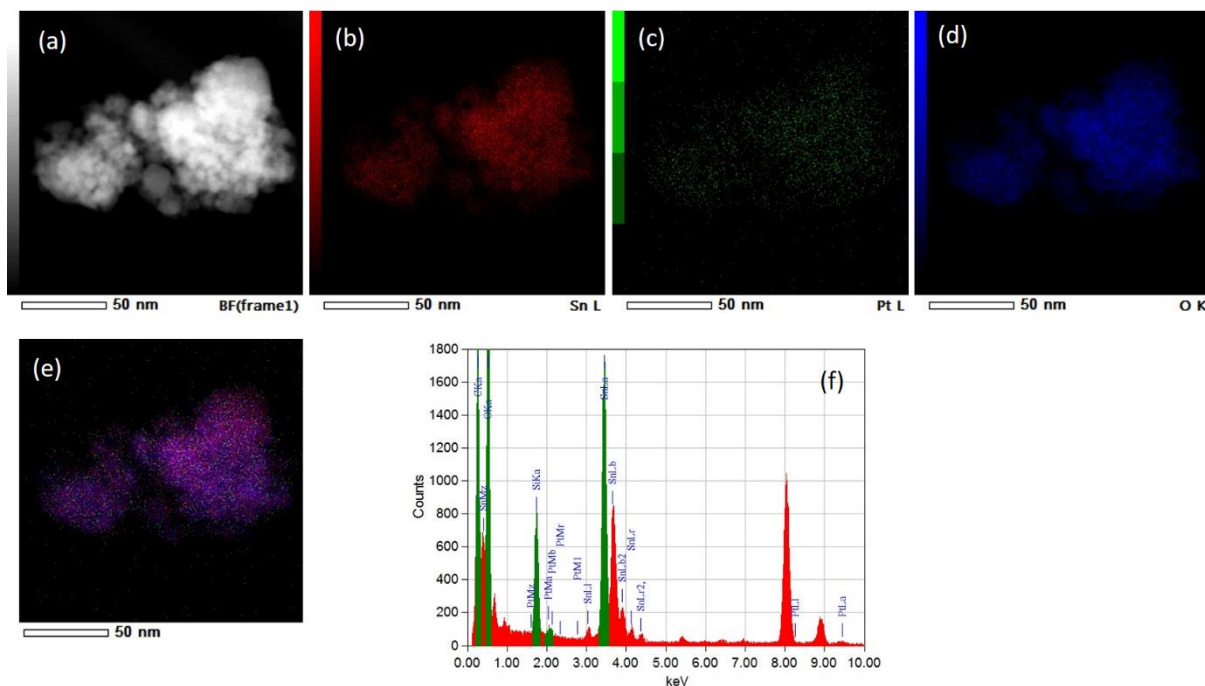

**Figure S8.** STEM image of sample SN-2 (a) and corresponding EDXS elemental mapping images of Sn L edge (b), Pt M edge (c), O K edge (d) and overlay of Sn L, Pt M and O K edges (e). EDXS spectrum of sample SN-1 (f). It can be seen that all three elements are homogeneously dispersed and that there are no distinct Pt clusters.

#### 4. References

- [1] G. Štefanić, S. Krehula, I. Štefanić, *Chem. Commun.* 49 (2013) 9245–9247.
- [2] R. W. Cheary, A. A. Coelho, *J Appl. Cryst.* 25 (1992) 109-121.
- [3] G.K. Williamson, W.H. Hall, *Acta Metallurgica.* 1 (1953) 22–31.
